# Supplementary material
Source: PubMed Central journal article supplement (PMC4113458)
Supplement: supp_WNL.0000000000000517_6.17.14_The_joint_effect_of_mid-.pdf [file supp_WNL.0000000000000517_6.17.14_The_joint_effect_of_mid-.pdf]

## Joint effect of mid- and late-life blood pressure on the brain: The AGES-Reykjavik Study

التأثير المشترك لضغط الدم في منتصف العمر وعند الشيخوخة على الدماغ: دراسة AGES-Reykjavik

**الغاية:** افترضنا أنه عند المرضى الذين أصيبوا بارتفاع ضغط الدم في منتصف العمر، فإن انخفاض ضغط الدم عند الشيخوخة سيرتبط بازدياد إمرضية (باثولوجية) الدماغ.

**طريقة البحث:** شارك في الدراسة 4057 من المسنين والمستأن الذين لا يعانون من الخرف. تمت عملية المسح لديهم عند منتصف العمر (متوسط العمر  $6 \pm 50$  سنوات) وعند سن الشيخوخة (متوسط العمر  $6 \pm 76$  سنوات) حيث تم مسح أمراضية الأوعية الدموية، الوظيفة الإدراكية، وصورة الرنين المغناطيسي للتأكد من بنية الدماغ حسب دراسة (Age, Gene/Environment Susceptibility) AGES-Reykjavik Study.

**النتائج:** وجدنا أن العلاقة ما بين مرض ارتفاع الضغط عند سن الشيخوخة ومقاييس الدماغ اعتمدت على وجود مرض ارتفاع الضغط في منتصف العمر. لوحظ أن ارتفاع ضغط الدم الانقباضي والانبساطي في سن الشيخوخة يرتبط بزيادة خطر تكوّن آفات في المادة البيضاء للجهاز العصبي وأيضاً بزيادة خطر حدوث النزوف الدماغية المجهرية إلا أن هذه العلاقة كانت أوضح وأقوى لدى المشاركين الذين لم يعانون من الضغط المرتفع في منتصف العمر. في المقابل، عند المشاركين ذوي الضغط المرتفع في منتصف العمر، فإن انخفاض ضغط الدم الانبساطي في سن الشيخوخة ارتبط بانخفاض الحجم الكلي للدماغ وحجم المادة السنجابية (Matter Gray). هذا الاكتشاف انعكس أيضاً على المستوى الإدراكي حيث أنه عند المشاركين ذوي الضغط المرتفع في منتصف العمر، فإن انخفاض ضغط الدم الانبساطي في سن الشيخوخة ارتبط بانخفاض مستوى الذاكرة.

**الاستنتاجات:** في هذه الدراسة السكانية الحشدية الكبيرة، وجدنا أن تأثير ضغط الدم عند الشيخوخة على إمرضية الدماغ وأدائه الإدراكي يعتمد على ما إذا كان مرض ارتفاع ضغط الدم كان موجوداً في منتصف العمر أم لا. دراستنا تقترح أن معرفة وجود مرض ارتفاع ضغط الدم في السابق هو أمر مهم لفهم مدى تأثير ضغط الدم على تركيبية ووظيفة الدماغ.

**Objective:** We hypothesized that in participants with a history of hypertension, lower late-life blood pressure (BP) will be associated with more brain pathology.

**Methods:** Participants are 4,057 older men and women without dementia with midlife (mean age  $50 \pm 6$  years) and late-life (mean age  $76 \pm 5$  years) vascular screening, cognitive function, and brain structures on MRI ascertained as part of the Age, Gene/Environment Susceptibility (AGES)-Reykjavik Study.

Results: The association of late-life BP to brain measures depended on midlife hypertension history. Higher late-life systolic and diastolic BP (DBP) was associated with an increased risk of white matter lesions and cerebral microbleeds, and this was most pronounced in participants without a history of midlife hypertension. In contrast, in participants with a history of midlife hypertension, lower late-life DBP was associated with smaller total brain and gray matter volumes. This finding was reflected back in cognitive performance; in participants with midlife hypertension, lower DBP was associated with lower memory scores.

Conclusion: In this large population-based cohort, late-life BP differentially affects brain pathology and cognitive performance, depending on the history of midlife hypertension. Our study suggests history of hypertension is critical to understand how late-life BP affects brain structure and function.

**Translator: Saad Kanaan MD, Department of Neurology, The University of Oklahoma Health Sciences Center, Oklahoma City, OK**

**Translation Reviewer: Ahmad A Al-Awwad MD, Department of Neurology, The University of Oklahoma Health Sciences Center, Oklahoma City, OK**
